# Supplementary material
Source: PubMed Central journal article supplement (PMC6760841)
Supplement: NIHMS1051057-supplement-Supplemental.pdf [file NIHMS1051057-supplement-Supplemental.pdf]

**Table S1. Difference in eGFR decline (unit: ml/min per 1.73 m<sup>2</sup>) per year according to blood pressure categories in the total population and by race.**

| <b>Differences (95% CIs) in eGFR decline (unit: ml/min per 1.73 m<sup>2</sup>) per year</b> |                                                   |                                                        |                                                           |                                            |
|---------------------------------------------------------------------------------------------|---------------------------------------------------|--------------------------------------------------------|-----------------------------------------------------------|--------------------------------------------|
|                                                                                             | <b>SBP &lt;120 mm Hg<br/>and DBP &lt;80 mm Hg</b> | <b>120 ≤SBP &lt;130 mm Hg<br/>and DBP &lt;80 mm Hg</b> | <b>130 ≤SBP &lt;140 mm Hg<br/>or 80 ≤DBP &lt;90 mm Hg</b> | <b>SBP ≥140 mm Hg<br/>or DBP ≥90 mm Hg</b> |
| <b>Total Population</b>                                                                     | <b>N=7,150<sup>a</sup></b>                        | <b>N=2,063<sup>a</sup></b>                             | <b>N=3,120<sup>a</sup></b>                                | <b>N=2,521<sup>a</sup></b>                 |
| <b>Unadjusted</b>                                                                           | Ref                                               | -0.26 (-0.32, -0.20)                                   | -0.27 (-0.32, -0.22)                                      | -0.66 (-0.71, -0.60)                       |
| <b>Adjusted<sup>b,c</sup></b>                                                               | Ref                                               | -0.15 (-0.20, -0.09)                                   | -0.14 (-0.19, -0.09)                                      | -0.42 (-0.48, -0.36)                       |
| <b>Caucasian</b>                                                                            | <b>N=5,961</b>                                    | <b>N=1,625</b>                                         | <b>N=2,055</b>                                            | <b>N=1,362</b>                             |
| <b>Unadjusted</b>                                                                           | Ref                                               | -0.19 (-0.24, -0.13)                                   | -0.17 (-0.22, -0.12)                                      | -0.45 (-0.51, -0.38)                       |
| <b>Adjusted<sup>c,d</sup></b>                                                               | Ref                                               | -0.12 (-0.18, -0.07)                                   | -0.15 (-0.20, -0.10)                                      | -0.37 (-0.43, -0.30)                       |
| <b>African-American</b>                                                                     | <b>N=1,189</b>                                    | <b>N=438</b>                                           | <b>N=1,065</b>                                            | <b>N=1,159</b>                             |
| <b>Unadjusted</b>                                                                           | Ref                                               | -0.39 (-0.58, -0.20)                                   | -0.20 (-0.34, -0.06)                                      | -0.64 (-0.79, -0.49)                       |
| <b>Adjusted<sup>c,d,e</sup></b>                                                             | Ref                                               | -0.29 (-0.47, -0.10)                                   | -0.18 (-0.31, -0.04)                                      | -0.55 (-0.70, -0.40)                       |

*Note:* Differences (95% confidence intervals) in eGFR decline (mL/min/1.73 m<sup>2</sup>) per year, compared to SBP <120 mm Hg and DBP <80 mm Hg as reference.

Abbreviations: BP, blood pressure; DBP, diastolic blood pressure; eGFR, estimated glomerular filtration rate; MED, medication; Ref, reference; SBP, systolic blood pressure.

<sup>a</sup> The number of participants on antihypertensive MED of each blood pressure category is as follows: SBP <120 mm Hg and DBP <80 mm Hg, n=905; 120 ≤SBP <130 mm Hg and DBP <80 mm Hg, n=509; 130 ≤SBP <140 mm Hg or 80 ≤DBP <90 mm Hg, n=1,062; SBP ≥140 mm Hg or DBP ≥90 mm Hg, n=1,147.

<sup>b</sup> Model adjusted for age, sex, race-center, baseline body mass index, baseline smoking status, baseline education level, baseline total family income, antihypertensive MED status, baseline high density lipoprotein cholesterol level, baseline history of diabetes, baseline history of coronary heart disease, as well as their interaction with follow-up time.

<sup>c</sup> P-values for interaction between antihypertensive MED status and follow-up time are 0.99, 0.38, and 0.21 for total population, Caucasian, and African-American respectively.

<sup>d</sup> Model adjusted for age, sex, center, baseline body mass index, baseline smoking status, baseline education level, baseline total family income, antihypertensive MED status, baseline high density lipoprotein cholesterol level, baseline history of diabetes, baseline history of coronary heart disease, as well as their interaction with follow-up time.

<sup>e</sup> African Americans in the Minnesota and Washington County cohorts was excluded in adjusted model because of small numbers.

**Table S2. Difference in eGFR decline (unit: ml/min per 1.73 m<sup>2</sup>) per year according to hypertension categories in the total population and by race with imputing the eGFR from the 2728 form.**

| <b>Differences (95% CIs) in eGFR decline (unit: ml/min per 1.73 m<sup>2</sup>) per year</b> |                                                |                                                  |                                                  |                                                                    |                                                                   |
|---------------------------------------------------------------------------------------------|------------------------------------------------|--------------------------------------------------|--------------------------------------------------|--------------------------------------------------------------------|-------------------------------------------------------------------|
| <b>Population</b>                                                                           | <b>Normal BP<sup>a</sup></b><br><b>N=6,200</b> | <b>Elevated BP<sup>a</sup></b><br><b>N=1,554</b> | <b>Stage 1 HTN<sup>a</sup></b><br><b>N=2,058</b> | <b>Stage 2 HTN</b><br><b>w/o MED<sup>a</sup></b><br><b>N=1,374</b> | <b>Stage 2 HTN</b><br><b>w/ MED<sup>a</sup></b><br><b>N=3,668</b> |
| <b>Unadjusted</b>                                                                           | Ref                                            | -0.23 (-0.30, -0.16)                             | -0.25 (-0.31, -0.19)                             | -0.60 (-0.68, -0.53)                                               | -0.51 (-0.56, -0.46)                                              |
| <b>Adjusted<sup>b,c</sup></b>                                                               | Ref                                            | -0.13 (-0.20, -0.07)                             | -0.14 (-0.19, -0.08)                             | -0.38 (-0.45, -0.31)                                               | -0.17 (-0.22, -0.12)                                              |
| <b>Caucasian</b>                                                                            | <b>N=5,341</b>                                 | <b>N=1,281</b>                                   | <b>N=1,448</b>                                   | <b>N=801</b>                                                       | <b>N=2,132</b>                                                    |
| <b>Unadjusted</b>                                                                           | Ref                                            | -0.17 (-0.23, -0.11)                             | -0.15 (-0.20, -0.09)                             | -0.41 (-0.49, -0.33)                                               | -0.31 (-0.36, -0.26)                                              |
| <b>Adjusted<sup>d</sup></b>                                                                 | Ref                                            | -0.12 (-0.18, -0.06)                             | -0.15 (-0.20, -0.09)                             | -0.36 (-0.44, -0.28)                                               | -0.19 (-0.24, -0.13)                                              |
| <b>African-American</b>                                                                     | <b>N=859</b>                                   | <b>N=273</b>                                     | <b>N=610</b>                                     | <b>N=573</b>                                                       | <b>N=1,536</b>                                                    |
| <b>Unadjusted</b>                                                                           | Ref                                            | -0.39 (-0.63, -0.14)                             | -0.23 (-0.42, -0.05)                             | -0.64 (-0.84, -0.44)                                               | -0.50 (-0.66, -0.35)                                              |
| <b>Adjusted<sup>d,e</sup></b>                                                               | Ref                                            | -0.27 (-0.49, -0.04)                             | -0.16 (-0.33, 0.01)                              | -0.50 (-0.69, -0.31)                                               | -0.17 (-0.31, -0.02)                                              |

*Note:* Differences (95% confidence intervals) in eGFR decline (mL/min/1.73 m<sup>2</sup>) per year, compared to normal BP as reference.

Abbreviations: BP, blood pressure; DBP, diastolic blood pressure; eGFR, estimated glomerular filtration rate; HTN, hypertension; MED, medication; Ref, reference; SBP, systolic blood pressure.

<sup>a</sup> Normal BP defined as SBP < 120 mm Hg and DBP < 80 mm Hg. Elevated BP defined as 120 ≤ SBP < 130 mm Hg and DBP < 80 mm Hg. Stage 1 HTN defined as 130 ≤ SBP < 140 mm Hg or 80 ≤ DBP < 90 mm Hg. Stage 2 HTN defined as SBP ≥ 140 mm Hg or DBP ≥ 90 mm Hg, and this group was stratified by the use of antihypertensive MED in the last 2 weeks.

<sup>b</sup> Model adjusted for age, sex, race-center, baseline body mass index, baseline smoking status, baseline education level, baseline annual family income, baseline high density lipoprotein cholesterol level, baseline history of diabetes, baseline history of coronary heart disease, as well as their interaction with follow-up time.

<sup>c</sup> P-value for interaction race  $\times$  elevated BP  $\times$  time = 0.16, race  $\times$  stage 1 HTN  $\times$  time = 0.94, race  $\times$  stage 2 HTN w/o MED  $\times$  time = 0.08, race  $\times$  stage 2 HTN w/ MED  $\times$  time = 0.01.

<sup>d</sup> Model adjusted for age, sex, center, baseline body mass index, baseline smoking status, baseline education level, baseline annual family income, baseline high density lipoprotein cholesterol level, baseline history of diabetes, baseline history of coronary heart disease, as well as their interaction with follow-up time.

<sup>e</sup> African Americans in the Minnesota and Washington County cohorts was excluded in adjusted model because of small numbers.
